# Supplementary material for: Dupilumab is effective in type 2‐high asthma patients receiving high‐dose inhaled corticosteroids at baseline
Source: PubMed Central journal article supplement — Allergy. 2020 Oct 21;76(1):269–80. doi: 10.1111/all.14611 (PMC7820970; doi:10.1111/all.14611), 2020-10-21
Supplement: ALL-76-269-s004.pdf [file ALL-76-269-s004.pdf]

# Dupilumab phase 2b study

# Dupilumab phase 3 LIBERTY ASTHMA QUEST

## High-dose ICS at baseline (ITT population)

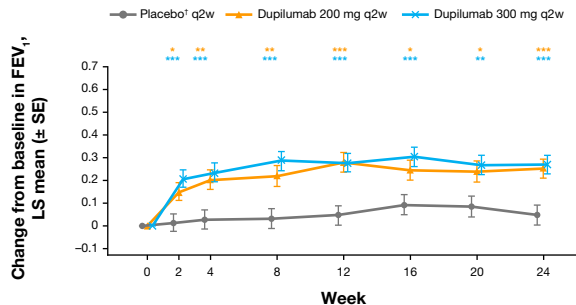

| Number of patients       | 0  | 2  | 4  | 8  | 12 | 16 | 20 | 24 |
|--------------------------|----|----|----|----|----|----|----|----|
| Placebo <sup>2</sup> q2w | 77 | 73 | 70 | 57 | 58 | 65 | 61 | 53 |
| Dupilumab 200 mg q2w     | 75 | 73 | 71 | 67 | 67 | 67 | 66 | 67 |
| Dupilumab 300 mg q2w     | 79 | 78 | 73 | 71 | 75 | 75 | 71 | 73 |

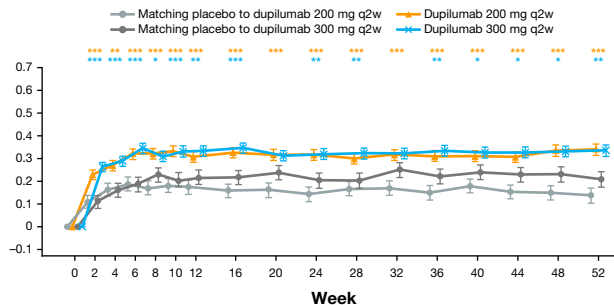

| Number of patients                       | 0   | 2   | 4   | 6   | 8   | 10  | 12  | 16  | 20  | 24  | 28  | 32  | 36  | 40  | 44  | 48  | 52  |
|------------------------------------------|-----|-----|-----|-----|-----|-----|-----|-----|-----|-----|-----|-----|-----|-----|-----|-----|-----|
| Matching placebo to dupilumab 200 mg q2w | 172 | 172 | 169 | 164 | 167 | 164 | 167 | 163 | 167 | 164 | 162 | 160 | 161 | 160 | 162 | 158 | 134 |
| Dupilumab 200 mg q2w                     | 317 | 307 | 310 | 308 | 304 | 304 | 310 | 307 | 300 | 302 | 295 | 297 | 297 | 293 | 296 | 290 | 244 |
| Matching placebo to dupilumab 300 mg q2w | 167 | 165 | 163 | 163 | 161 | 161 | 162 | 159 | 156 | 150 | 157 | 153 | 156 | 155 | 152 | 150 | 134 |
| Dupilumab 300 mg q2w                     | 323 | 320 | 315 | 315 | 309 | 301 | 309 | 310 | 304 | 305 | 296 | 290 | 296 | 295 | 285 | 286 | 244 |

## Medium-dose ICS at baseline (ITT population)

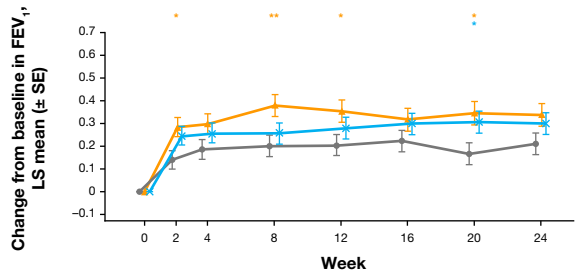

| Number of patients       | 0  | 2  | 4  | 8  | 12 | 16 | 20 | 24 |
|--------------------------|----|----|----|----|----|----|----|----|
| Placebo <sup>2</sup> q2w | 78 | 70 | 72 | 69 | 70 | 72 | 67 | 69 |
| Dupilumab 200 mg q2w     | 69 | 69 | 69 | 64 | 63 | 63 | 62 | 62 |
| Dupilumab 300 mg q2w     | 74 | 71 | 71 | 65 | 68 | 68 | 67 | 67 |

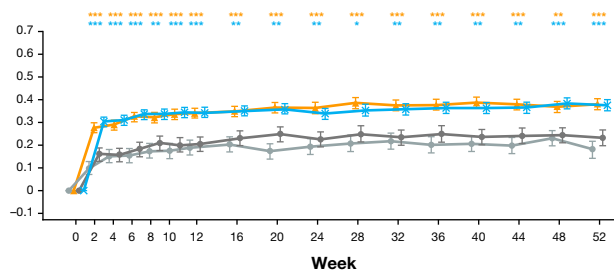

| Number of patients                       | 0   | 2   | 4   | 6   | 8   | 10  | 12  | 16  | 20  | 24  | 28  | 32  | 36  | 40  | 44  | 48  | 52  |
|------------------------------------------|-----|-----|-----|-----|-----|-----|-----|-----|-----|-----|-----|-----|-----|-----|-----|-----|-----|
| Matching placebo to dupilumab 200 mg q2w | 144 | 142 | 137 | 136 | 137 | 136 | 139 | 136 | 135 | 135 | 128 | 126 | 128 | 127 | 126 | 123 | 106 |
| Dupilumab 200 mg q2w                     | 310 | 300 | 300 | 304 | 297 | 300 | 298 | 297 | 301 | 297 | 294 | 288 | 293 | 284 | 285 | 280 | 233 |
| Matching placebo to dupilumab 300 mg q2w | 151 | 146 | 145 | 147 | 147 | 145 | 148 | 148 | 145 | 143 | 144 | 145 | 142 | 140 | 138 | 138 | 113 |
| Dupilumab 300 mg q2w                     | 303 | 298 | 292 | 290 | 293 | 290 | 294 | 294 | 283 | 284 | 284 | 283 | 283 | 286 | 281 | 272 | 242 |
