# Supplementary material for: Dupilumab is effective in type 2‐high asthma patients receiving high‐dose inhaled corticosteroids at baseline
Source: PubMed Central journal article supplement — Allergy. 2020 Oct 21;76(1):269–80. doi: 10.1111/all.14611 (PMC7820970; doi:10.1111/all.14611), 2020-10-21
Supplement: ALL-76-269-s005.pdf [file ALL-76-269-s005.pdf]

Baseline blood eosinophils  $\geq 150$  cells/ $\mu$ L

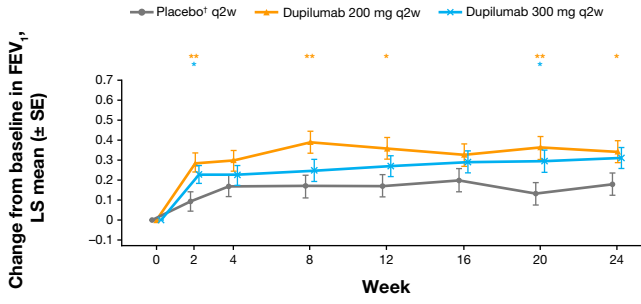

Number of patients

|                      |    |    |    |    |    |    |    |    |
|----------------------|----|----|----|----|----|----|----|----|
| Placebo q2w          | 59 | 52 | 53 | 52 | 52 | 54 | 49 | 51 |
| Dupilumab 200 mg q2w | 58 | 58 | 58 | 54 | 53 | 53 | 53 | 53 |
| Dupilumab 300 mg q2w | 62 | 59 | 59 | 54 | 57 | 56 | 55 | 55 |

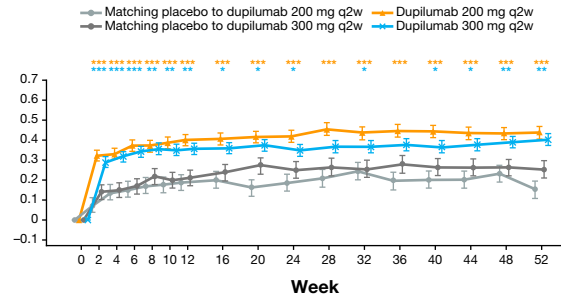

Number of patients

|                                          |     |     |     |     |     |     |     |     |     |     |     |     |     |     |     |     |     |
|------------------------------------------|-----|-----|-----|-----|-----|-----|-----|-----|-----|-----|-----|-----|-----|-----|-----|-----|-----|
| Matching placebo to dupilumab 200 mg q2w | 105 | 104 | 100 | 100 | 100 | 100 | 102 | 101 | 99  | 98  | 92  | 93  | 94  | 94  | 93  | 91  | 77  |
| Dupilumab 200 mg q2w                     | 210 | 204 | 205 | 208 | 202 | 203 | 203 | 204 | 207 | 206 | 203 | 199 | 202 | 197 | 197 | 195 | 165 |
| Matching placebo to dupilumab 300 mg q2w | 107 | 102 | 102 | 104 | 103 | 102 | 104 | 104 | 101 | 100 | 100 | 101 | 99  | 98  | 94  | 97  | 79  |
| Dupilumab 300 mg q2w                     | 218 | 214 | 208 | 206 | 208 | 208 | 209 | 209 | 201 | 202 | 203 | 201 | 201 | 203 | 202 | 192 | 172 |

Baseline blood eosinophils  $\geq 300$  cells/ $\mu$ L

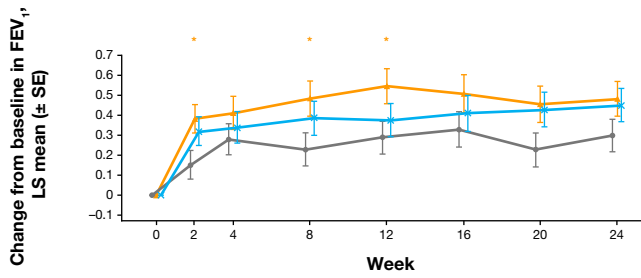

Number of patients

|                      |    |    |    |    |    |    |    |    |
|----------------------|----|----|----|----|----|----|----|----|
| Placebo q2w          | 33 | 26 | 27 | 26 | 27 | 28 | 26 | 28 |
| Dupilumab 200 mg q2w | 25 | 25 | 25 | 23 | 23 | 23 | 23 | 23 |
| Dupilumab 300 mg q2w | 29 | 26 | 27 | 25 | 26 | 25 | 24 | 25 |

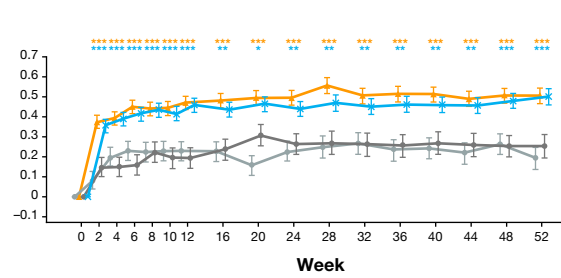

Number of patients

|                                          |     |     |     |     |     |     |     |     |     |     |     |     |     |     |     |     |     |
|------------------------------------------|-----|-----|-----|-----|-----|-----|-----|-----|-----|-----|-----|-----|-----|-----|-----|-----|-----|
| Matching placebo to dupilumab 200 mg q2w | 68  | 68  | 66  | 65  | 65  | 66  | 66  | 66  | 65  | 63  | 61  | 61  | 62  | 61  | 61  | 51  |     |
| Dupilumab 200 mg q2w                     | 134 | 129 | 131 | 133 | 131 | 129 | 129 | 131 | 133 | 131 | 129 | 128 | 128 | 127 | 128 | 125 | 104 |
| Matching placebo to dupilumab 300 mg q2w | 61  | 58  | 60  | 59  | 58  | 60  | 59  | 58  | 58  | 60  | 60  | 59  | 57  | 55  | 57  | 44  |     |
| Dupilumab 300 mg q2w                     | 129 | 126 | 121 | 120 | 120 | 121 | 122 | 121 | 115 | 117 | 118 | 118 | 117 | 119 | 120 | 110 | 95  |

Baseline FeNO  $\geq 25$  ppb

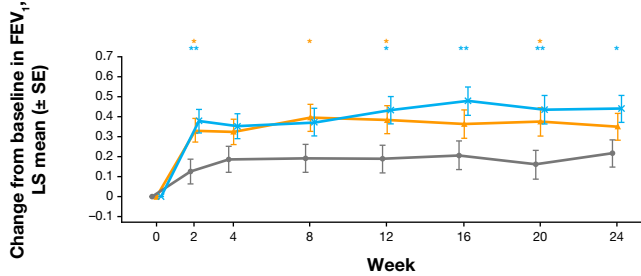

Number of patients

|                      |    |    |    |    |    |    |    |    |
|----------------------|----|----|----|----|----|----|----|----|
| Placebo q2w          | 40 | 34 | 37 | 35 | 35 | 36 | 34 | 36 |
| Dupilumab 200 mg q2w | 37 | 37 | 37 | 35 | 34 | 33 | 34 | 34 |
| Dupilumab 300 mg q2w | 37 | 34 | 36 | 32 | 33 | 33 | 32 | 33 |

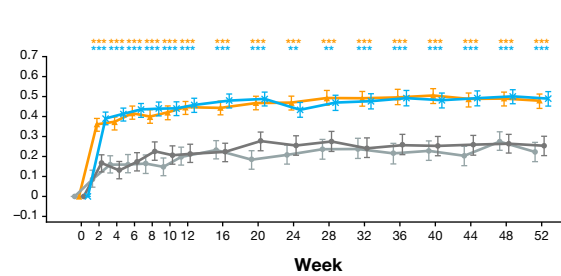

Number of patients

|                                          |     |     |     |     |     |     |     |     |     |     |     |     |     |     |     |     |     |
|------------------------------------------|-----|-----|-----|-----|-----|-----|-----|-----|-----|-----|-----|-----|-----|-----|-----|-----|-----|
| Matching placebo to dupilumab 200 mg q2w | 84  | 83  | 80  | 79  | 81  | 80  | 82  | 80  | 80  | 80  | 75  | 76  | 78  | 75  | 77  | 75  | 65  |
| Dupilumab 200 mg q2w                     | 153 | 149 | 149 | 151 | 148 | 149 | 145 | 147 | 151 | 148 | 147 | 143 | 146 | 141 | 143 | 140 | 115 |
| Matching placebo to dupilumab 300 mg q2w | 81  | 79  | 77  | 79  | 78  | 80  | 79  | 77  | 77  | 75  | 77  | 79  | 76  | 74  | 74  | 76  | 65  |
| Dupilumab 300 mg q2w                     | 147 | 143 | 140 | 138 | 140 | 138 | 139 | 140 | 138 | 135 | 137 | 138 | 136 | 139 | 138 | 131 | 117 |

Baseline blood eosinophils  $\geq 150$  cells/ $\mu$ L or FeNO  $\geq 25$  ppb

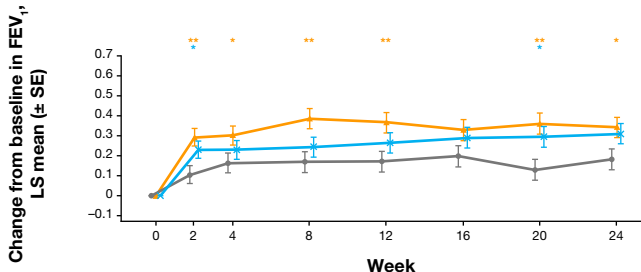

Number of patients

|                      |    |    |    |    |    |    |    |    |
|----------------------|----|----|----|----|----|----|----|----|
| Placebo q2w          | 66 | 58 | 60 | 58 | 58 | 60 | 55 | 57 |
| Dupilumab 200 mg q2w | 62 | 62 | 62 | 58 | 57 | 57 | 57 | 57 |
| Dupilumab 300 mg q2w | 65 | 62 | 62 | 57 | 60 | 59 | 58 | 58 |

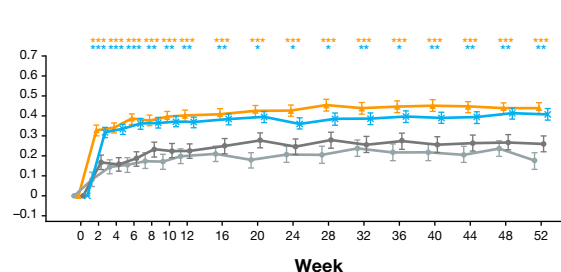

Number of patients

|                                          |     |     |     |     |     |     |     |     |     |     |     |     |     |     |     |     |     |
|------------------------------------------|-----|-----|-----|-----|-----|-----|-----|-----|-----|-----|-----|-----|-----|-----|-----|-----|-----|
| Matching placebo to dupilumab 200 mg q2w | 119 | 117 | 113 | 112 | 113 | 113 | 115 | 113 | 111 | 111 | 105 | 105 | 107 | 105 | 105 | 103 | 89  |
| Dupilumab 200 mg q2w                     | 237 | 231 | 231 | 234 | 228 | 229 | 229 | 230 | 233 | 231 | 228 | 223 | 227 | 220 | 222 | 219 | 184 |
| Matching placebo to dupilumab 300 mg q2w | 123 | 118 | 118 | 120 | 119 | 118 | 120 | 120 | 117 | 115 | 116 | 117 | 115 | 113 | 110 | 113 | 94  |
| Dupilumab 300 mg q2w                     | 241 | 237 | 231 | 229 | 231 | 230 | 232 | 232 | 223 | 223 | 225 | 223 | 223 | 225 | 224 | 212 | 192 |
