# Supplementary material for: Dupilumab is effective in type 2‐high asthma patients receiving high‐dose inhaled corticosteroids at baseline
Source: PubMed Central journal article supplement — Allergy. 2020 Oct 21;76(1):269–80. doi: 10.1111/all.14611 (PMC7820970; doi:10.1111/all.14611), 2020-10-21
Supplement: ALL-76-269-s007.pdf [file ALL-76-269-s007.pdf]

# Dupilumab phase 2b study

# Dupilumab phase 3 LIBERTY ASTHMA QUEST

## Baseline blood eosinophils $\geq 150$ cells/ $\mu$ L

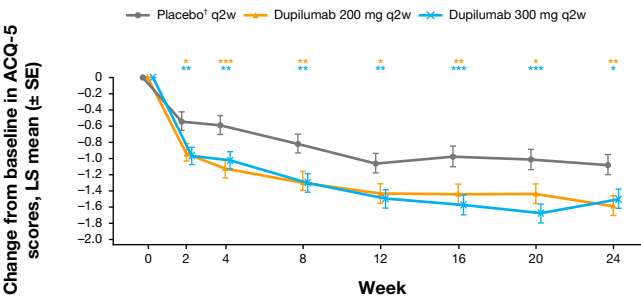

| Number of patients       | 0  | 2  | 4  | 8  | 12 | 16 | 20 | 24 |
|--------------------------|----|----|----|----|----|----|----|----|
| Placebo <sup>a</sup> q2w | 59 | 52 | 53 | 51 | 52 | 53 | 49 | 53 |
| Dupilumab 200 mg q2w     | 58 | 57 | 58 | 51 | 51 | 52 | 53 | 53 |
| Dupilumab 300 mg q2w     | 62 | 56 | 59 | 53 | 57 | 56 | 55 | 55 |

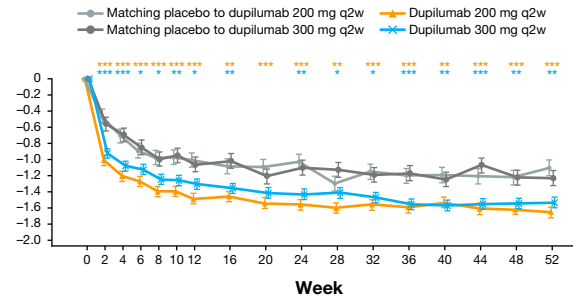

| Number of patients                       | 0   | 2   | 4   | 6   | 8   | 10  | 12  | 16  | 20  | 24  | 28  | 32  | 36  | 40  | 44  | 48  | 52  |
|------------------------------------------|-----|-----|-----|-----|-----|-----|-----|-----|-----|-----|-----|-----|-----|-----|-----|-----|-----|
| Matching placebo to dupilumab 200 mg q2w | 105 | 100 | 96  | 97  | 97  | 99  | 102 | 98  | 96  | 96  | 90  | 90  | 93  | 91  | 90  | 89  | 74  |
| Dupilumab 200 mg q2w                     | 210 | 199 | 200 | 204 | 199 | 202 | 203 | 200 | 205 | 201 | 202 | 195 | 200 | 189 | 195 | 193 | 164 |
| Matching placebo to dupilumab 300 mg q2w | 107 | 100 | 101 | 103 | 103 | 101 | 102 | 103 | 101 | 100 | 100 | 100 | 98  | 98  | 94  | 93  | 78  |
| Dupilumab 300 mg q2w                     | 218 | 209 | 205 | 204 | 206 | 206 | 208 | 207 | 200 | 199 | 203 | 196 | 197 | 196 | 195 | 189 | 169 |

## Baseline blood eosinophils $\geq 300$ cells/ $\mu$ L

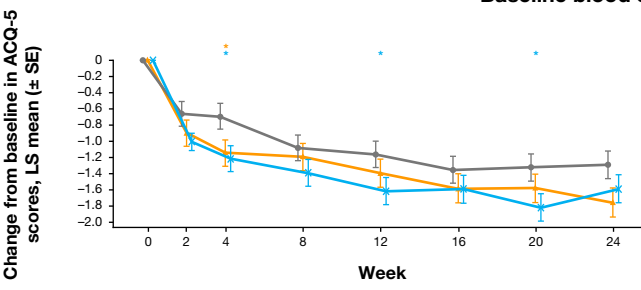

| Number of patients       | 0  | 2  | 4  | 8  | 12 | 16 | 20 | 24 |
|--------------------------|----|----|----|----|----|----|----|----|
| Placebo <sup>a</sup> q2w | 33 | 27 | 27 | 26 | 27 | 28 | 26 | 28 |
| Dupilumab 200 mg q2w     | 25 | 24 | 25 | 23 | 22 | 22 | 23 | 23 |
| Dupilumab 300 mg q2w     | 29 | 25 | 27 | 24 | 26 | 25 | 24 | 24 |

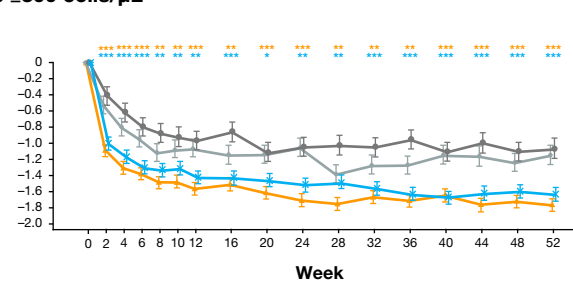

| Number of patients                       | 0   | 2   | 4   | 6   | 8   | 10  | 12  | 16  | 20  | 24  | 28  | 32  | 36  | 40  | 44  | 48  | 52  |
|------------------------------------------|-----|-----|-----|-----|-----|-----|-----|-----|-----|-----|-----|-----|-----|-----|-----|-----|-----|
| Matching placebo to dupilumab 200 mg q2w | 68  | 66  | 65  | 66  | 65  | 65  | 67  | 65  | 64  | 64  | 62  | 60  | 61  | 60  | 60  | 60  | 48  |
| Dupilumab 200 mg q2w                     | 134 | 126 | 127 | 133 | 129 | 129 | 130 | 128 | 132 | 129 | 129 | 127 | 128 | 122 | 127 | 124 | 104 |
| Matching placebo to dupilumab 300 mg q2w | 61  | 56  | 59  | 59  | 59  | 59  | 59  | 59  | 58  | 58  | 60  | 59  | 58  | 58  | 56  | 55  | 44  |
| Dupilumab 300 mg q2w                     | 129 | 122 | 118 | 120 | 119 | 120 | 122 | 121 | 115 | 115 | 116 | 113 | 115 | 113 | 113 | 107 | 93  |

## Baseline FeNO $\geq 25$ ppb

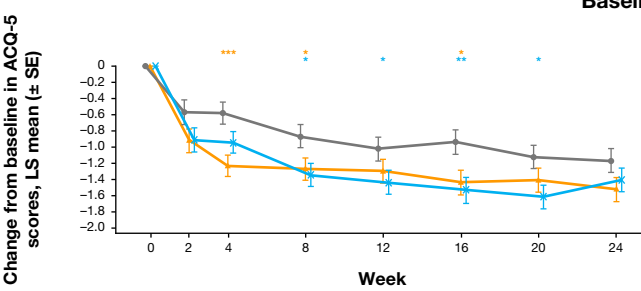

| Number of patients       | 0  | 2  | 4  | 8  | 12 | 16 | 20 | 24 |
|--------------------------|----|----|----|----|----|----|----|----|
| Placebo <sup>a</sup> q2w | 40 | 34 | 37 | 34 | 35 | 35 | 33 | 36 |
| Dupilumab 200 mg q2w     | 37 | 36 | 37 | 34 | 32 | 32 | 34 | 34 |
| Dupilumab 300 mg q2w     | 37 | 34 | 36 | 32 | 33 | 33 | 32 | 33 |

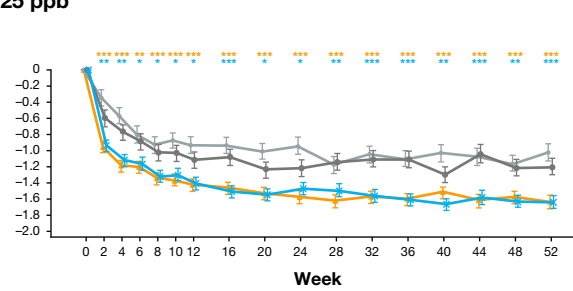

| Number of patients                       | 0   | 2   | 4   | 6   | 8   | 10  | 12  | 16  | 20  | 24  | 28  | 32  | 36  | 40  | 44  | 48  | 52  |
|------------------------------------------|-----|-----|-----|-----|-----|-----|-----|-----|-----|-----|-----|-----|-----|-----|-----|-----|-----|
| Matching placebo to dupilumab 200 mg q2w | 84  | 79  | 77  | 77  | 79  | 79  | 81  | 81  | 79  | 79  | 74  | 72  | 76  | 73  | 75  | 74  | 63  |
| Dupilumab 200 mg q2w                     | 153 | 147 | 146 | 150 | 146 | 148 | 147 | 146 | 151 | 147 | 147 | 141 | 146 | 139 | 142 | 139 | 114 |
| Matching placebo to dupilumab 300 mg q2w | 81  | 78  | 76  | 78  | 77  | 78  | 78  | 78  | 77  | 75  | 77  | 78  | 75  | 75  | 75  | 74  | 64  |
| Dupilumab 300 mg q2w                     | 147 | 139 | 138 | 136 | 139 | 137 | 139 | 139 | 139 | 135 | 133 | 136 | 136 | 134 | 134 | 133 | 128 |

## Baseline blood eosinophils $\geq 150$ cells/ $\mu$ L or FeNO $\geq 25$ ppb

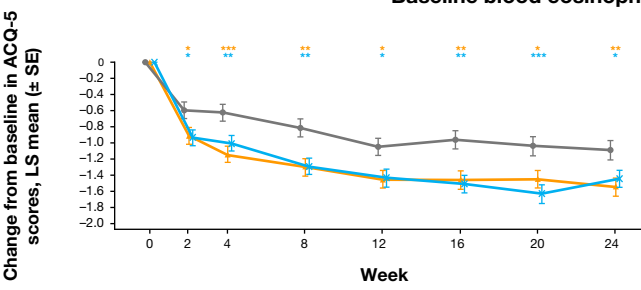

| Number of patients       | 0  | 2  | 4  | 8  | 12 | 16 | 20 | 24 |
|--------------------------|----|----|----|----|----|----|----|----|
| Placebo <sup>a</sup> q2w | 66 | 58 | 60 | 57 | 58 | 59 | 54 | 59 |
| Dupilumab 200 mg q2w     | 62 | 61 | 62 | 55 | 55 | 56 | 57 | 57 |
| Dupilumab 300 mg q2w     | 65 | 59 | 62 | 56 | 60 | 59 | 58 | 58 |

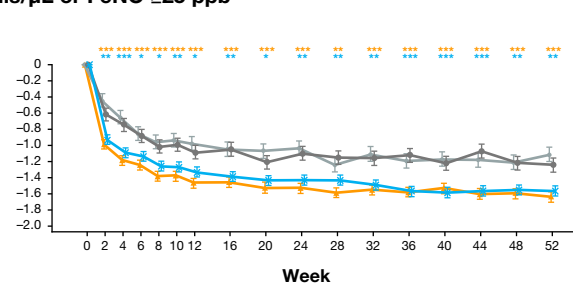

| Number of patients                       | 0   | 2   | 4   | 6   | 8   | 10  | 12  | 16  | 20  | 24  | 28  | 32  | 36  | 40  | 44  | 48  | 52  |
|------------------------------------------|-----|-----|-----|-----|-----|-----|-----|-----|-----|-----|-----|-----|-----|-----|-----|-----|-----|
| Matching placebo to dupilumab 200 mg q2w | 119 | 112 | 109 | 109 | 110 | 112 | 115 | 111 | 109 | 109 | 103 | 102 | 106 | 103 | 102 | 101 | 86  |
| Dupilumab 200 mg q2w                     | 237 | 226 | 226 | 230 | 225 | 227 | 229 | 228 | 231 | 227 | 226 | 219 | 225 | 213 | 220 | 217 | 183 |
| Matching placebo to dupilumab 300 mg q2w | 123 | 116 | 117 | 119 | 119 | 117 | 118 | 119 | 117 | 115 | 116 | 116 | 114 | 113 | 110 | 109 | 92  |
| Dupilumab 300 mg q2w                     | 241 | 232 | 228 | 227 | 229 | 228 | 231 | 230 | 221 | 220 | 225 | 218 | 219 | 217 | 216 | 209 | 189 |
