# Supplementary figures and images for: Dupilumab is effective in type 2‐high asthma patients receiving high‐dose inhaled corticosteroids at baseline
Source: PubMed Central journal article supplement — Allergy. 2020 Oct 21;76(1):269–80. doi: 10.1111/all.14611 (PMC7820970; doi:10.1111/all.14611), 2020-10-21

## Dupilumab Phase 2b Study

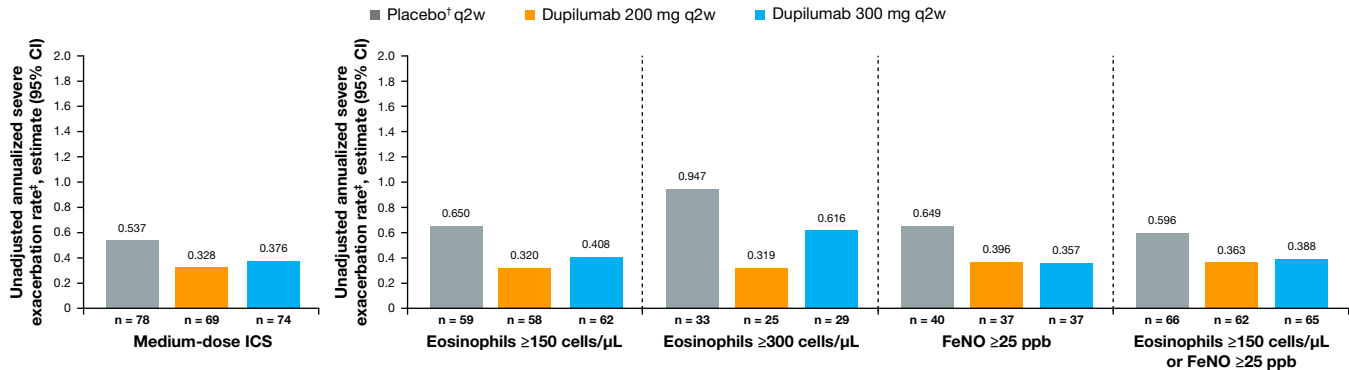

## Dupilumab Phase 3 LIBERTY ASTHMA QUEST

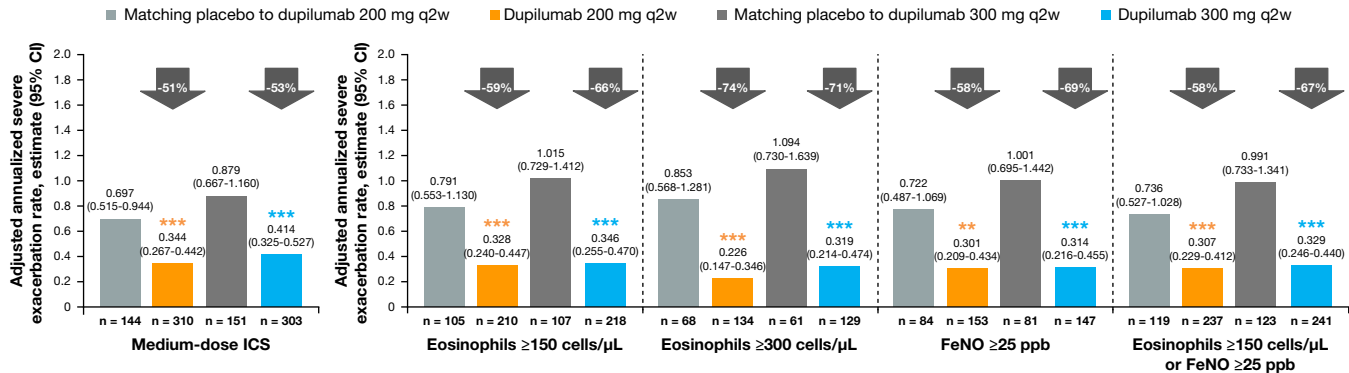

Supplement: ALL-76-269-s003.pdf [file ALL-76-269-s003.pdf]
